# Supplementary material
Source: publisher figshare collection journal article supplement (https://tandf.figshare.com/articles/dataset/_/1601912)

A Atg39 (*S. cerevisiae*)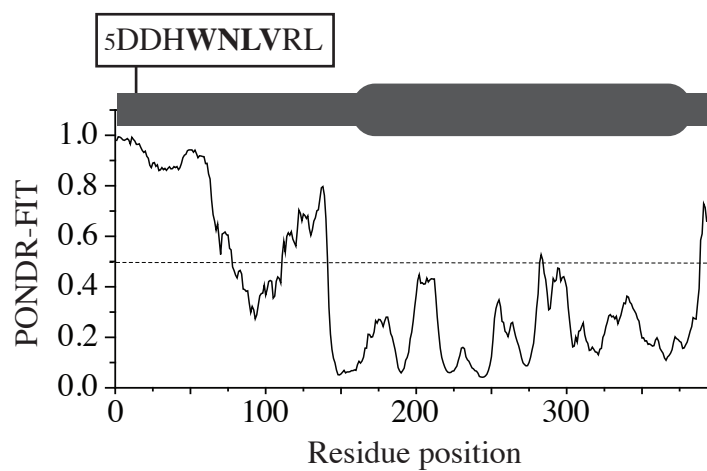B Atg40 (*S. cerevisiae*)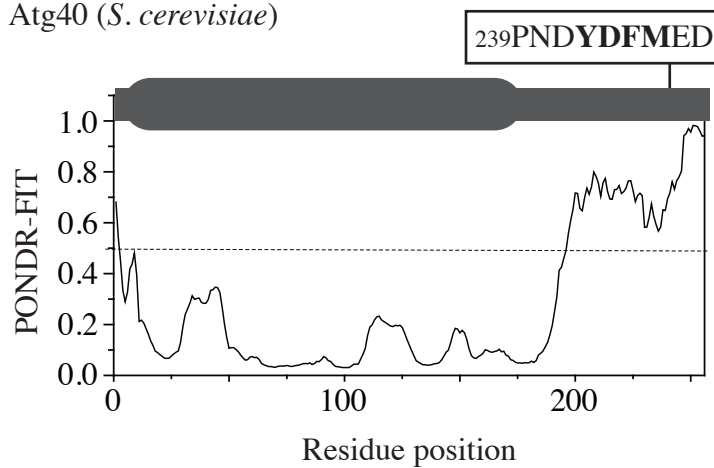C JIP1 (*H. sapiens*)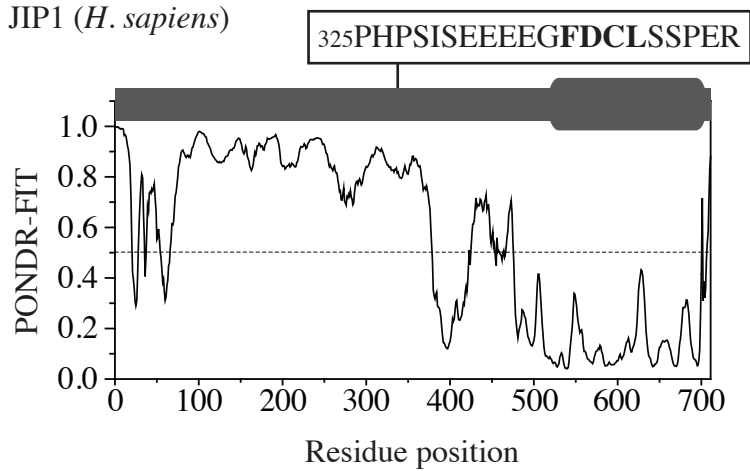

Supplement: Supplementary file 1 [file 2]

Figure S1

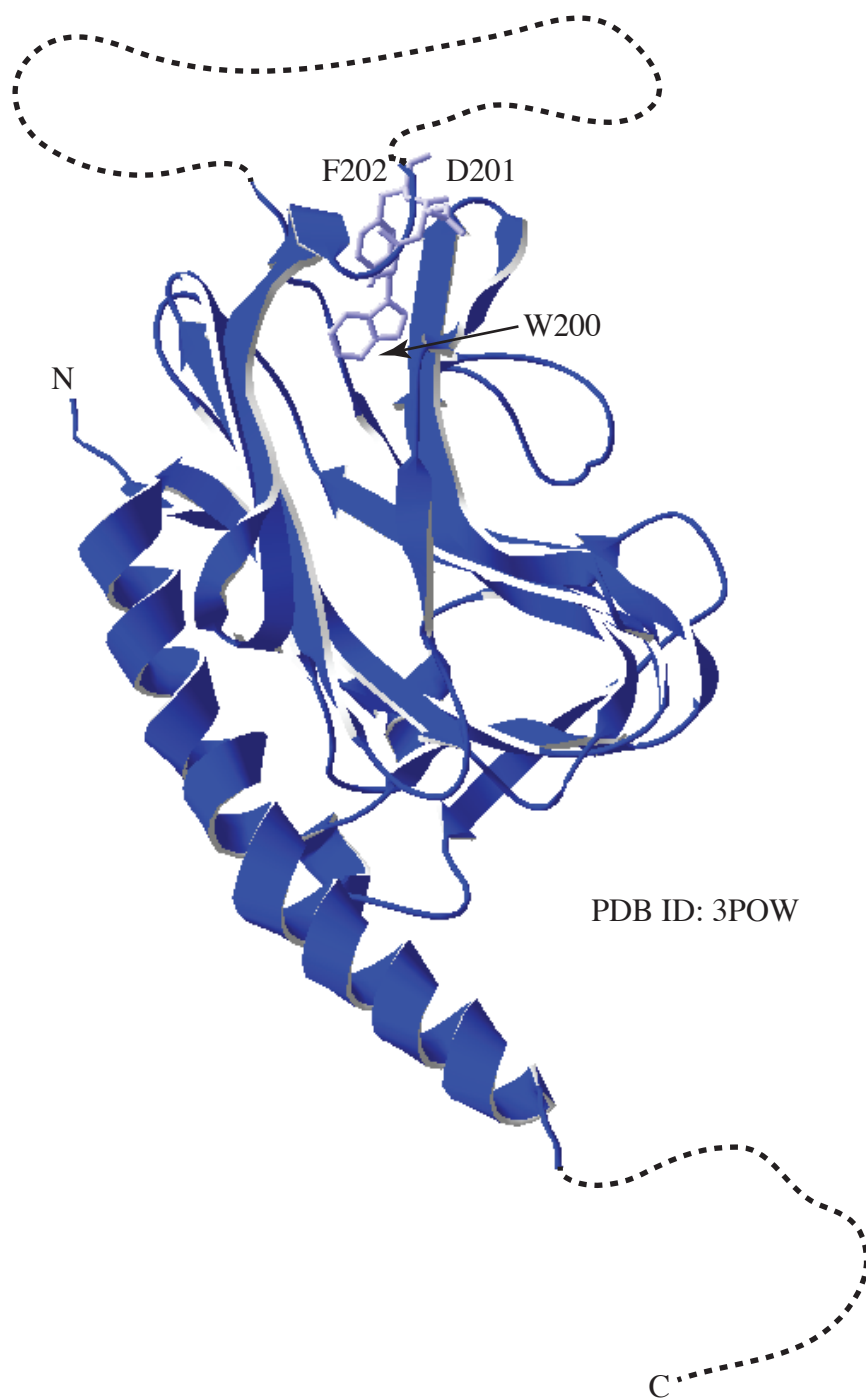

Supplement: Supplementary file 2 [file 2]

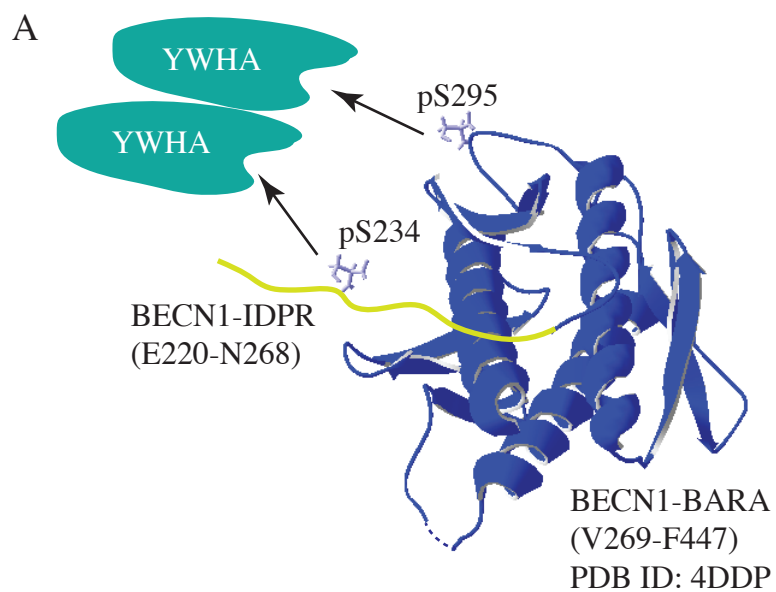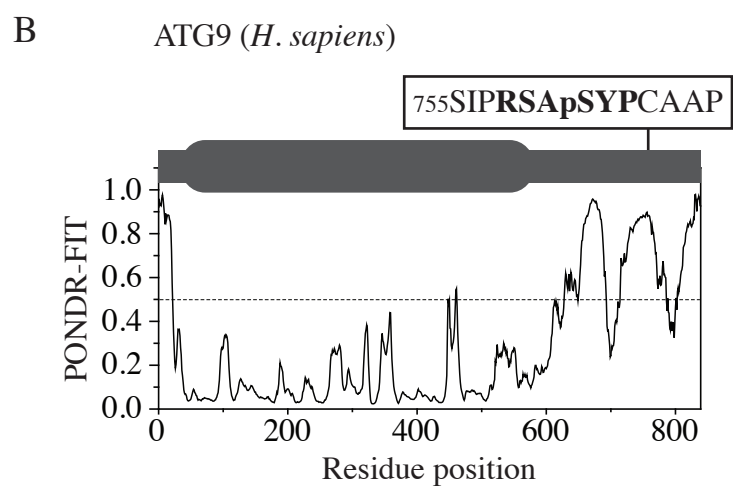

Supplement: Supplementary file 3 [file 2]
